# Supplementary material for: Superior performance asymmetric supercapacitors based on ZnCo2O4@MnO2core–shell electrode
Source: Royal Society of Chemistry journal article supplement (doi:10.1039/c5ta00012b), 2015-01-01
Supplement: c5ta00012b1.pdf [file c5ta00012b1.pdf]

## Supporting Information

### Superior Performance Asymmetric Supercapacitors Based on $\text{ZnCo}_2\text{O}_4@\text{MnO}_2$ Core-shell Electrode

Wenqin Ma, Honghong Nan, Zhengxiang Gu, Baoyou Geng, Xiaojun Zhang\*

Key Laboratory for Functional Molecular Solids of the Education Ministry of China,  
College of Chemistry and Materials Science, Center for Nano Science and  
Technology, Anhui Normal University, Wuhu, 241000, P R China.

#### Experimental Section:

##### Synthesis of 3D porous spinous $\alpha\text{-Fe}_2\text{O}_3$ on soft thin Fe substrate

In a typical procedure, a Fe foil (1 cm  $\times$  1 cm) was cleaned from a consecutive ultrasonication in acetone, ethanol, distilled water. 5 mL Oleic, 2 mL HCl (36%-38%) and 10 mL Ethanol were added and formed solution, After that the prepared Fe foil being immersed in solution in a 60 mL autoclave. Meanwhile the autoclave was sealed and maintained at 60°C for 4h, and then cooled naturally to room temperature. The Fe substrate attached with brown things was washed with water and ethanol for several times before characterization. Finally as-synthesized materials were subsequent annealing at 400 °C in air.

#### Calculation methods:

The discharge specific capacitance ( $C_{sp}$ ) or areal capacitance ( $C_a$ ) in the three-electrode was calculated from the discharge curves using the following equation:<sup>[1,2]</sup>

$$C_{sp} = \frac{It}{m\Delta V} \quad C_a = \frac{It}{S\Delta V}$$

where  $I$  (A) is the discharge current,  $t$  (s) is the discharge time,  $\Delta V$  (V) is the voltage interval of the discharge, and  $m$  (g) is the active material mass of the electrode.  $S$  is the geometrical area of the electrode.

The energy density and power density are calculated according to the following equations respectively:<sup>[3,4]</sup>

$$E = 0.5C\Delta V^2 \quad P = \frac{E}{t}$$

Where  $C$  ( $F\ g^{-1}$ ) is the specific capacitance,  $E$  ( $Wh\ kg^{-1}$ ) is the energy density,  $P$  ( $W\ kg^{-1}$ ) is the power density,  $I$  (A) is the discharge current,  $t$  (s) is the discharge time, and  $\Delta V$  (V) is the potential window of discharge.

For supercapacitors, the charge balance between the two electrodes will follow the relationship  $q^+ = q^-$ , where  $q^+$  means the charges stored at the positive electrode,  $q^-$  means the charges stored at the negative electrode. The charge stored by each electrode usually depends on the specific capacitance ( $C$ ), the potential window for the charge/discharge process ( $\Delta E$ ), and the mass of the electrode ( $m$ ) following Equation:  $q = C \times \Delta E \times m$ . The mass ratio between the positive and negative electrodes needs to follow:<sup>[5]</sup>

$$\frac{m_+}{m_-} = \frac{C_- \times \Delta E_-}{C_+ \times \Delta E_+}$$

Therefore, the optimal mass ratio between such two electrodes can be determined by

the specific capacitance values and potential windows. The  $\text{ZnCo}_2\text{O}_4@\text{MnO}_2$  to  $\alpha\text{-Fe}_2\text{O}_3$  mass ratio was adjusted to be 0.92:1. So the total mass of the two active electrode materials is  $2.5 \text{ mg cm}^{-2}$ .

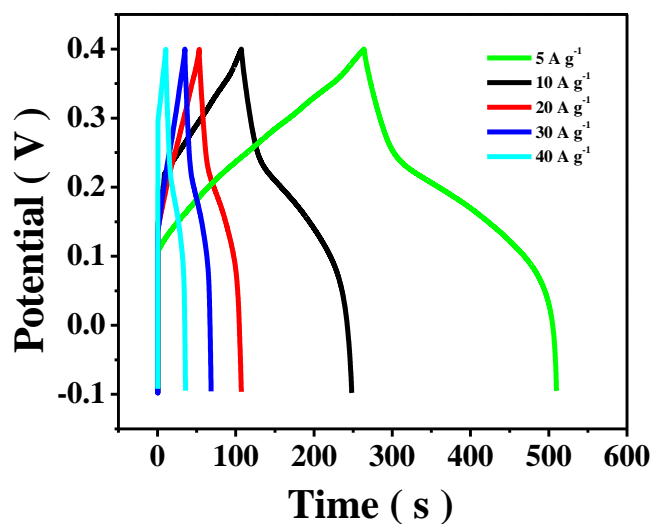

**Figure S1** Electrochemical characterizations of the hierarchical  $\text{ZnCo}_2\text{O}_4@\text{MnO}_2$  core-shell NTs arrays grown on Ni foam: charge-discharge voltage profiles at different current densities.

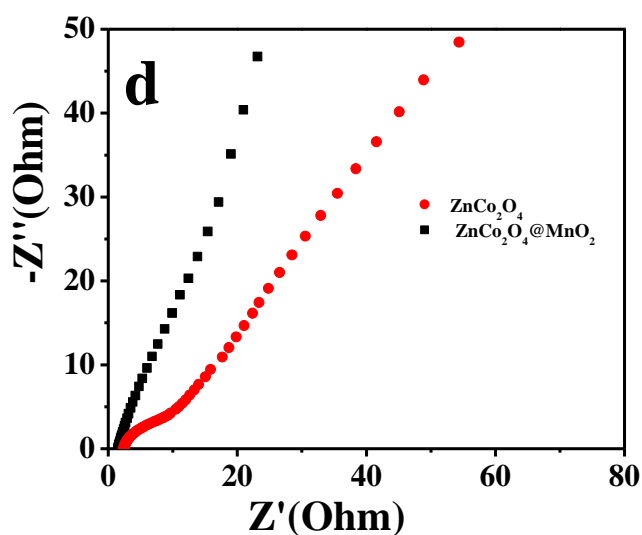

**Figure S2** Impedance Nyquist plots of the  $\text{ZnCo}_2\text{O}_4$  NW arrays and the hierarchical  $\text{ZnCo}_2\text{O}_4@\text{MnO}_2$  core-shell NTs arrays grown on Ni foam at open circuit potential.

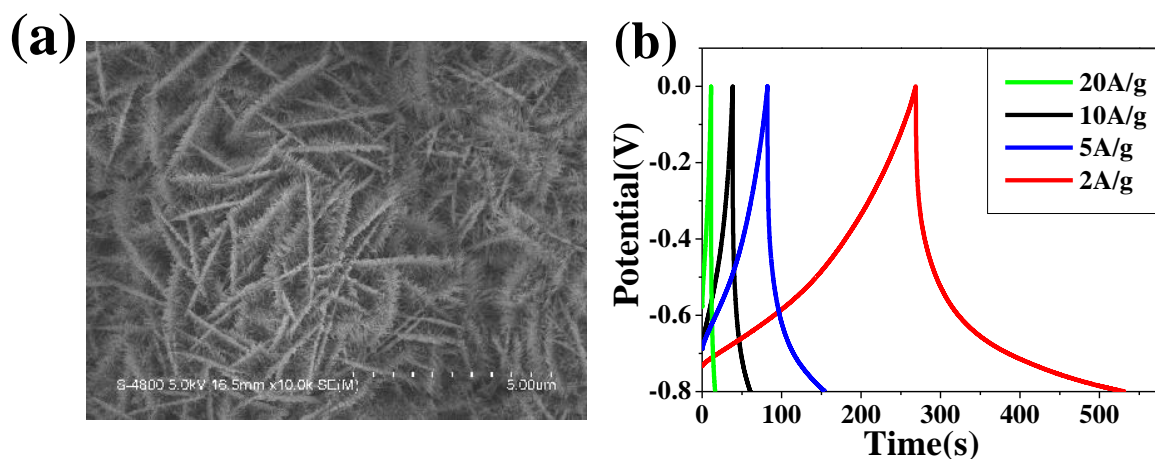

**Figure S3** (a) Typical FESEM images of the 3D porous  $\alpha$ -Fe<sub>2</sub>O<sub>3</sub>; (b) Galvanostatic charging/discharging curves of the 3D porous  $\alpha$ -Fe<sub>2</sub>O at different current densities.

**Table 1** Summarization of the supercapacitor performance of different electrode material.

| Electrode material                                            | Current density        | Specific capacitance     | Reference     |
|---------------------------------------------------------------|------------------------|--------------------------|---------------|
| ZnCo <sub>2</sub> O <sub>4</sub> @MnO <sub>2</sub> NTs        | 12 mA cm <sup>-2</sup> | 2.32 F cm <sup>-2</sup>  | This our work |
| Co <sub>3</sub> O <sub>4</sub> -MnO <sub>2</sub> NW/nanosheet | 12 mA cm <sup>-2</sup> | 0.56 F cm <sup>-2</sup>  | Ref. 6        |
| MnO <sub>2</sub> -NiO NWs                                     | 12 mA cm <sup>-2</sup> | 0.35 F cm <sup>-2</sup>  | Ref. 7        |
| Co <sub>3</sub> O <sub>4</sub> -NiO NWs                       | 12 mA cm <sup>-2</sup> | 1.35 F cm <sup>-2</sup>  | Ref. 8        |
| ZnCo <sub>2</sub> O <sub>4</sub> NWs                          | 12 mA cm <sup>-2</sup> | 0.866 F cm <sup>-2</sup> | Ref. 9        |

Reference:

1. J. Yan, E. Khoo, A. Sumboja, P. S. Lee, *ACS Nano*, 2010, **4**, 4247.
2. C. Guan, X. L. Li, Z. L. Wang, X. H. Cao, C. Soci, H. Zhang, H. J. Fan, *Adv. Mater.*,

2012, **24**, 4186.

3. W. Chen, R. B. Rakhi, L. B. Hu, X. Xie, Y. Cui, H. N. Alshareef, *Nano Lett.*, 2011, **11**, 5165.

4. L. F. Chen, X. D. Zhang, H. W. Liang, M. G. Kong, Q. F. Guan, P. Chen, Z. Y. Wu, S. H. Yu, *ACS Nano*, 2012, **6**, 7092.

5. Z. J. Fan, J. Yan, T. Wei, L. J. Zhi, G. Q. Ning, T. Y. Li, F. Wei, *Adv. Funct. Mater.*, 2011, **21**, 2366.

6. J. H. Kim, S. H. Kang, K. Zhu, J. Y. Kim, N. R. Neale and A. J. Frank, *Chem. Commun.*, 2011, **47**, 5214.

7. J. P. Liu, J. Jiang, M. Bosman and H. J. Fan, *J. Mater. Chem.*, 2012, **22**, 2419.

8. X. H. Xia, J. P. Tu, Y. Q. Zhang, X. L. Wang, C. D. Gu, X. B. Zhao and H. J. Fan, *ACS Nano*, 2012, **6**, 5531.

9. S.B Wang, J. Pu, Y. Tong, Y.Y. Cheng, Y. Gao and Z. H. Wang, *J. Mater. Chem. A* 2014, **2**,5434.
